# Supplementary material for: Likely pathogenic structural variants in genetically unsolved patients with retinitis pigmentosa revealed by long-read sequencing
Source: HighWire-hosted journal article supplement (doi:10.1136/jmedgenet-2022-108428), 2022-06-15
Supplement: jmedgenet-2022-108428supp001_data_supplement.pdf [file jmedgenet-2022-108428supp001_data_supplement.pdf]

## Supplementary Information

### Identification of pathogenic structural variants in genetically unsolved patients with retinitis pigmentosa by long-read sequencing

Yusuke Sano, Yoshito Koyanagi, Jing Hao Wong, Yusuke Murakami, Kohta Fujiwara, Mikiko Endo, Tomomi Aoi, Kazuki Hashimoto, Toru Nakazawa, Yuko Wada, Shinji Ueno, Dan Gao, Akira Murakami, Yoshihiro Hotta, Yasuhiro Ikeda, Koji M Nishiguchi, Yukihide Momozawa, Koh-Hei Sonoda, Masato Akiyama, and Akihiro Fujimoto

Supplementary Figure 1: Schematic diagram of PCR primer sets for short-read sequencing

Supplementary Figure 2: Distribution of read length

Supplementary Figure 3: Distribution of read depth in *EYS* region

Supplementary Figure 4: IGV visualization of pathogenic variants detected in our previous study

Supplementary Figure 5: Clinical features of the two *EYS*-RP patients with large SVs

Supplementary Table 1: Summary of whole-genome sequencing

Supplementary Table 2: 89 genes associated with RP

Supplementary Table 3: Comparison of the number of SNVs called by  
short-read sequencing and long-read sequencing in the *EYS* region

Supplementary Table 4: Primer information

Supplementary Table 5: Summary of mapping

Supplementary Table 6: Mean depth and coverage rate in *EYS* region

Supplementary Table 7: Pathogenic variants detected in previous study

Supplementary Table 8: Number of exon-overlapping SVs by class

Supplementary Table 9: *RP1L1* variants in OPH690 detected using the targeted approach  
in our previous study.

Supplementary note: The adaptation of the ACMG guidelines for heterozygous pathogenic SNVs  
identified in our previous study

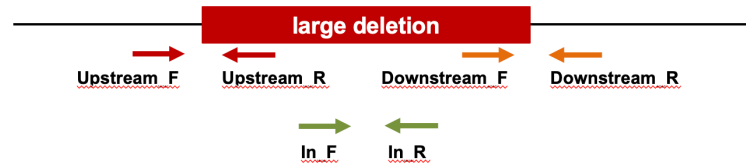**Supplementary Figure 1**

Schematic diagram of PCR primer sets for short-read sequencing. Primer sets: flanking the upstream breakpoint (Upstream\_F and Upstream\_R), flanking the downstream breakpoint (Downstream\_F and Downstream\_R), and amplifying the inside region of the large deletion (In\_F and In\_R) were designed. In\_F and In\_R are designed not to react with Downstream\_R and Upstream\_F, respectively. The pair of Upstream\_F and Downstream\_R reacts only in the presence of the deletion, when the product length becomes suitable for amplification.

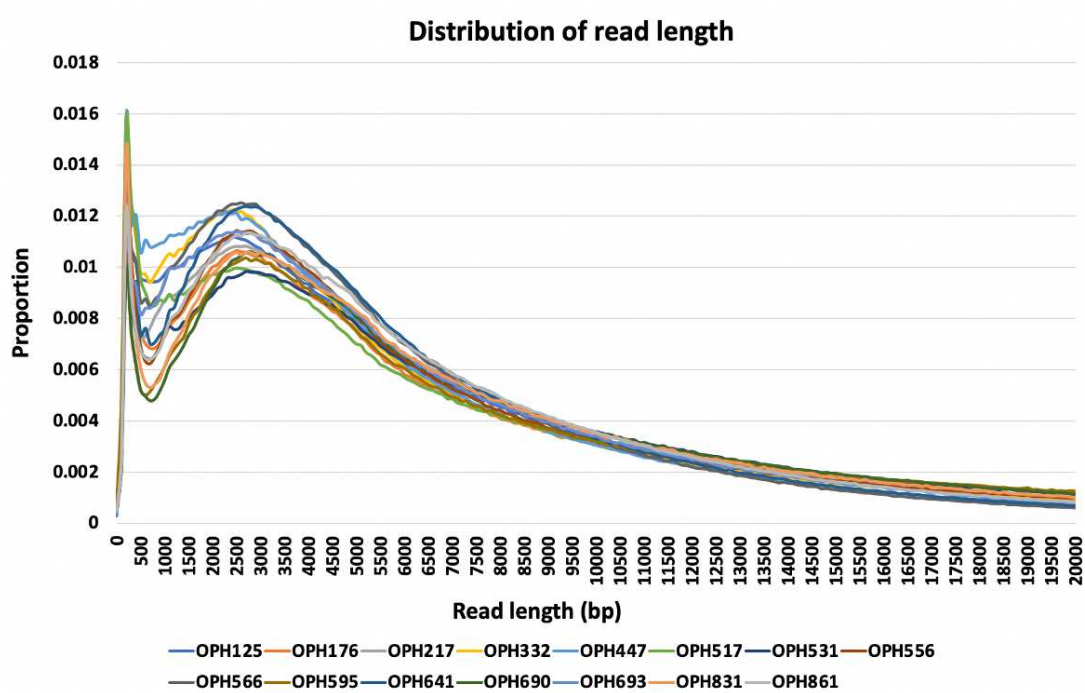

### Supplementary Figure 2

Distribution of read length. A large proportion of the reads were 2.7 kb in length; the average read length of the 15 RP cases was 8.1 kb.

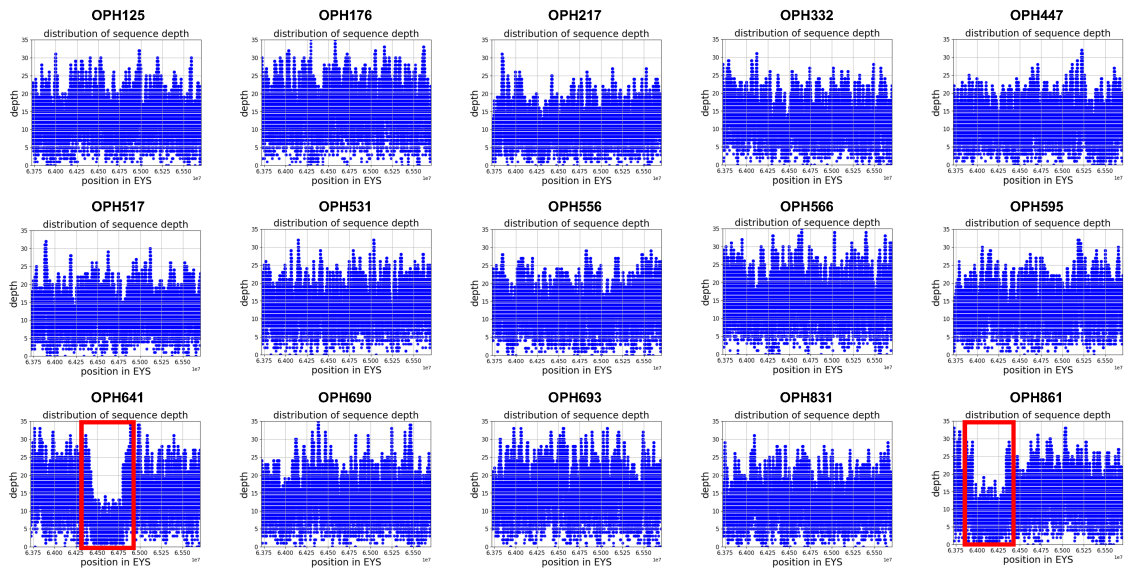**Supplementary Figure 3**

Distribution of read depth in *EYS* region. The sequence depth at each locus in the *EYS* region is plotted for each case. The red rectangles indicate the large deletion regions identified in this study.

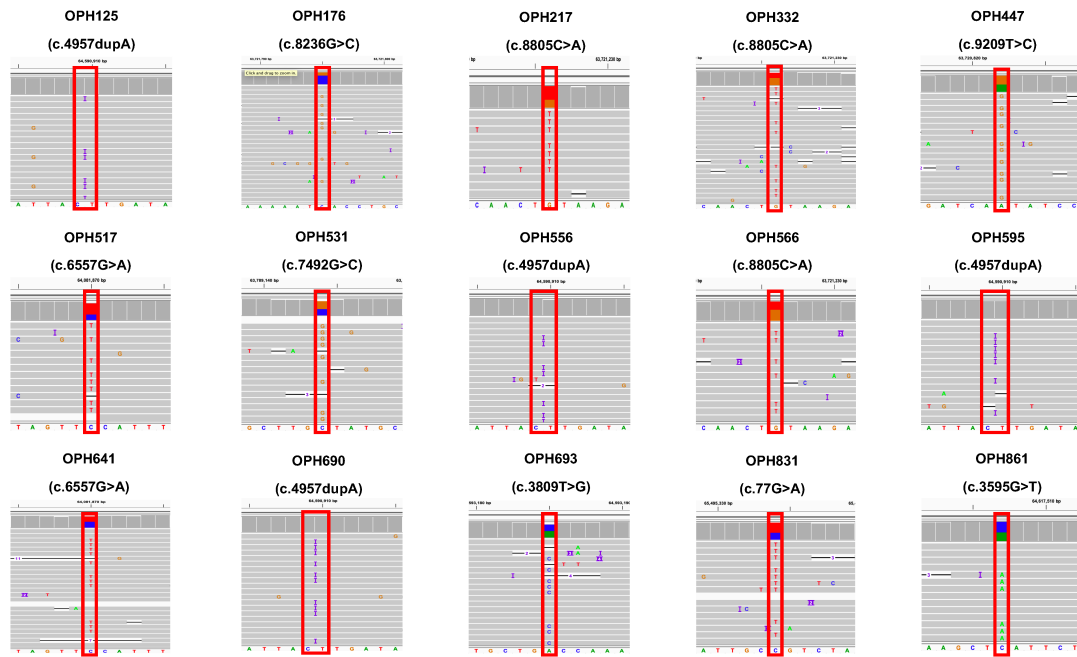**Supplementary Figure 4**

IGV visualization of pathogenic variants detected in our previous study. The *EYS* pathogenic variants detected by the previous targeted short-read sequencing study were also successfully identified by the long-reads. The red rectangles indicate the pathogenic SNVs and short indels.

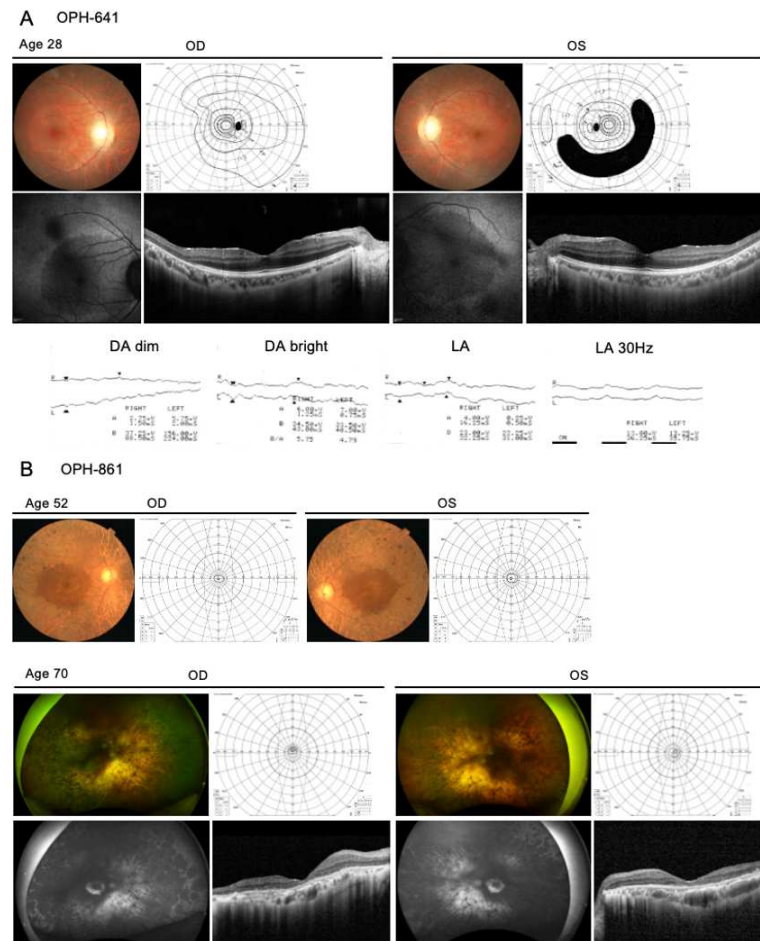

### Supplementary Figure 5

Clinical features of the two *EYS*-RP patients with large SVs.

- A.** Color fundus photographs (CFP), fundus autofluorescence (FAF), Goldmann visual fields (GVF), optical coherence tomography (OCT), and electroretinogram (ERG) of OPH-641 at age 28. OD - Right eye, OS - Left eye. Visual acuity was 20/20 in both eyes. In CFP, mild retinal degeneration associated with attenuated retinal vessels were observed along the vascular arcades. FAF exhibited the hyperautofluorescent ring surrounding the relatively preserved macula. Horizontal OCT images showed disrupted ellipsoid zone in the temporal macula. Mild visual field constriction (OD) and pericentral ring scotoma (OS) were observed with GVF. ERG demonstrated non-recordable rod response and severely impaired cone response.
- B.** CFP and GP at age 52 (upper column) and ultra-wide field CFP/FAF, GVF, and OCT at age 70 (lower column) of OPH-861. OD - Right eye, OS - Left eye. At age, 52, visual acuity was 20/2000 in both eyes. CFP showed severe retinal degeneration associated with bone spicule pigmentation extending from the vascular arcades to the peripheral retina. Granular pigmentary changes were also observed in the macula. GVF showed severe concentric contraction. At age 70, visual acuity was dropped to hand motion in both eyes. The eye examinations demonstrated massive retinal degeneration involving the macula and further constriction of central vision.

**Supplementary table 1: Summary of whole-genome sequencing**

| Sample ID | Number of runs | Total number of reads | Mean read length (bp) | Total yield (Gb) |
|-----------|----------------|-----------------------|-----------------------|------------------|
| OPH125    | 2              | 6,871,891             | 7,680                 | 53.1             |
| OPH176    | 3              | 6,420,990             | 9,470                 | 61.1             |
| OPH217    | 2              | 5,661,856             | 7,900                 | 45               |
| OPH332    | 2              | 6,848,271             | 7,200                 | 49.7             |
| OPH447    | 2              | 6,714,364             | 7,050                 | 47.7             |
| OPH517    | 2              | 5,732,203             | 8,730                 | 50.3             |
| OPH531    | 2              | 5,556,967             | 9,050                 | 50.6             |
| OPH556    | 2              | 6,244,530             | 8,300                 | 52.2             |
| OPH566    | 2              | 9,063,508             | 6,580                 | 60.1             |
| OPH595    | 2              | 5,265,214             | 10,030                | 53.1             |
| OPH641    | 2              | 7,984,124             | 7,040                 | 56.6             |
| OPH690    | 2              | 5,927,670             | 9,160                 | 54.6             |
| OPH693    | 2              | 7,701,357             | 7,520                 | 58.3             |
| OPH831    | 2              | 5,937,667             | 8,630                 | 51.5             |
| OPH861    | 2              | 7,419,708             | 7,710                 | 57.5             |
| Mean      | 2.1            | 6,623,355             | 8,137                 | 53.4             |

**Supplementary table 2: 89 genes associated with RP**

| causative genes | inheritance pattern          |
|-----------------|------------------------------|
| <i>ADIPOR1</i>  | autosomal dominant           |
| <i>ARL3</i>     | autosomal dominant           |
| <i>CRX</i>      | autosomal dominant           |
| <i>FSCN2</i>    | autosomal dominant           |
| <i>GUCA1B</i>   | autosomal dominant           |
| <i>HK1</i>      | autosomal dominant           |
| <i>IMPDH1</i>   | autosomal dominant           |
| <i>IMPG1</i>    | autosomal dominant           |
| <i>KLHL7</i>    | autosomal dominant           |
| <i>PRPF3</i>    | autosomal dominant           |
| <i>PRPF4</i>    | autosomal dominant           |
| <i>PRPF6</i>    | autosomal dominant           |
| <i>PRPF8</i>    | autosomal dominant           |
| <i>PRPF31</i>   | autosomal dominant           |
| <i>PRPH2</i>    | autosomal dominant           |
| <i>RDH12</i>    | autosomal dominant           |
| <i>ROM1</i>     | autosomal dominant           |
| <i>RP9</i>      | autosomal dominant           |
| <i>RP17</i>     | autosomal dominant           |
| <i>SEMA4A</i>   | autosomal dominant           |
| <i>SNRNP200</i> | autosomal dominant           |
| <i>SPP2</i>     | autosomal dominant           |
| <i>TOPORS</i>   | autosomal dominant           |
| <i>BEST1</i>    | autosomal dominant/recessive |
| <i>NR2E3</i>    | autosomal dominant/recessive |
| <i>NRL</i>      | autosomal dominant/recessive |
| <i>RHO</i>      | autosomal dominant/recessive |
| <i>RP1</i>      | autosomal dominant/recessive |
| <i>RPE65</i>    | autosomal dominant/recessive |
| <i>SAG</i>      | autosomal dominant/recessive |
| <i>ABCA4</i>    | autosomal recessive          |
| <i>AGBL5</i>    | autosomal recessive          |
| <i>AHR</i>      | autosomal recessive          |
| <i>ARHGEF18</i> | autosomal recessive          |



|                 |                     |
|-----------------|---------------------|
| <i>ARL6</i>     | autosomal recessive |
| <i>ARL2BP</i>   | autosomal recessive |
| <i>BBS1</i>     | autosomal recessive |
| <i>BBS2</i>     | autosomal recessive |
| <i>C2orf71</i>  | autosomal recessive |
| <i>C8orf37</i>  | autosomal recessive |
| <i>CERKL</i>    | autosomal recessive |
| <i>CLCC1</i>    | autosomal recessive |
| <i>CLRN1</i>    | autosomal recessive |
| <i>CNGA1</i>    | autosomal recessive |
| <i>CNGB1</i>    | autosomal recessive |
| <i>CRB1</i>     | autosomal recessive |
| <i>CYP4V2</i>   | autosomal recessive |
| <i>DHDDS</i>    | autosomal recessive |
| <i>DHX38</i>    | autosomal recessive |
| <i>EMC1</i>     | autosomal recessive |
| <i>EYS</i>      | autosomal recessive |
| <i>FAM161A</i>  | autosomal recessive |
| <i>GPR125</i>   | autosomal recessive |
| <i>HGSNAT</i>   | autosomal recessive |
| <i>IDH3B</i>    | autosomal recessive |
| <i>IFT140</i>   | autosomal recessive |
| <i>IFT172</i>   | autosomal recessive |
| <i>IMPG2</i>    | autosomal recessive |
| <i>KIAA1549</i> | autosomal recessive |
| <i>KIZ</i>      | autosomal recessive |
| <i>LRAT</i>     | autosomal recessive |
| <i>MAK</i>      | autosomal recessive |
| <i>MERTK</i>    | autosomal recessive |
| <i>MVK</i>      | autosomal recessive |
| <i>NEK2</i>     | autosomal recessive |
| <i>NEUROD1</i>  | autosomal recessive |
| <i>PDE6A</i>    | autosomal recessive |
| <i>PDE6B</i>    | autosomal recessive |
| <i>PDE6G</i>    | autosomal recessive |
| <i>POMGNT1</i>  | autosomal recessive |

|                |                     |
|----------------|---------------------|
| <i>PRCD</i>    | autosomal recessive |
| <i>PROM1</i>   | autosomal recessive |
| <i>RBP3</i>    | autosomal recessive |
| <i>REEP6</i>   | autosomal recessive |
| <i>RGR</i>     | autosomal recessive |
| <i>RLBP1</i>   | autosomal recessive |
| <i>RP1L1</i>   | autosomal recessive |
| <i>SAMD11</i>  | autosomal recessive |
| <i>SLC7A14</i> | autosomal recessive |
| <i>SPATA7</i>  | autosomal recessive |
| <i>TRNT1</i>   | autosomal recessive |
| <i>TTC8</i>    | autosomal recessive |
| <i>TULP1</i>   | autosomal recessive |
| <i>USH2A</i>   | autosomal recessive |
| <i>ZNF408</i>  | autosomal recessive |
| <i>ZNF513</i>  | autosomal recessive |
| <i>OFD1</i>    | X-linked            |
| <i>RP2</i>     | X-linked            |
| <i>RPGR</i>    | X-linked            |

Supplementary table 3: Comparison of the number of SNVs called by short-read sequencing and long-read sequencing in the EYS region

| sample  | SNV called by LRS in EYS region | SNV called by LRS in non-coding region of EYS | SNV called by LRS in coding region of EYS | SNV called by SRS in coding region of EYS | SNVs matched by LRS and SRS | Proportion of SNVs called by SRS and LRS among those called by LRS |
|---------|---------------------------------|-----------------------------------------------|-------------------------------------------|-------------------------------------------|-----------------------------|--------------------------------------------------------------------|
| OPH_125 | 94166                           | 93739                                         | 427                                       | 23                                        | 19                          | 0.044                                                              |
| OPH_176 | 97756                           | 97103                                         | 653                                       | 21                                        | 19                          | 0.029                                                              |
| OPH_217 | 108392                          | 107422                                        | 970                                       | 11                                        | 9                           | 0.009                                                              |
| OPH_332 | 109816                          | 109217                                        | 599                                       | 6                                         | 5                           | 0.008                                                              |
| OPH_447 | 97003                           | 96391                                         | 612                                       | 23                                        | 22                          | 0.036                                                              |
| OPH_517 | 103333                          | 102815                                        | 518                                       | 12                                        | 10                          | 0.019                                                              |
| OPH_531 | 88725                           | 88360                                         | 365                                       | 13                                        | 11                          | 0.03                                                               |
| OPH_556 | 95270                           | 94829                                         | 441                                       | 19                                        | 17                          | 0.039                                                              |
| OPH_566 | 95073                           | 94651                                         | 422                                       | 21                                        | 20                          | 0.047                                                              |
| OPH_595 | 85435                           | 84876                                         | 559                                       | 22                                        | 19                          | 0.034                                                              |
| OPH_641 | 125153                          | 124444                                        | 709                                       | 9                                         | 6                           | 0.008                                                              |
| OPH_690 | 101482                          | 101020                                        | 462                                       | 22                                        | 21                          | 0.045                                                              |
| OPH_693 | 100287                          | 99762                                         | 525                                       | 13                                        | 10                          | 0.019                                                              |
| OPH_831 | 107743                          | 107194                                        | 549                                       | 13                                        | 11                          | 0.02                                                               |
| OPH_861 | 114873                          | 114368                                        | 505                                       | 22                                        | 21                          | 0.042                                                              |
| mean    | 101633.8                        | 101079.4                                      | 554.4                                     | 16.7                                      | 14.7                        | 0.029                                                              |

**Supplementary table 4: Primer information**

OPH641

|                                                                                   | forward                  | reverse                   |
|-----------------------------------------------------------------------------------|--------------------------|---------------------------|
| Primer sequences designed to span the upstream breakpoint<br>(chr6: 64,423,168)   | TTACCCAGCCTAAGTAAAGTAGTC | AAGTGAGGGAGTTAAATGGTCA    |
| Primer sequences designed to span the downstream breakpoint<br>(chr6: 64,798,957) | ACTGATTTTCTGCAAAGCA      | GCATGTGACATCTTACTTGAAATGA |
| Primer sequences designed entirely inside the deletion                            | TTCACGAGAGGATTTTATTCAG   | GGCTCAAGAGGATATTGAAGAAT   |

OPH861

|                                                                                   | forward                  | reverse                  |
|-----------------------------------------------------------------------------------|--------------------------|--------------------------|
| Primer sequences designed to span the upstream breakpoint<br>(chr6: 63,942,752)   | CATCTTAATCCCAAACCAGGA    | ACTGAATTTTGCCAAATACTTTCT |
| Primer sequences designed to span the downstream breakpoint<br>(chr6: 64,337,822) | CAGTGGAGAATAATTGGTACC    | TGAAAGTGATCAGAATCAAGG    |
| Primer sequences designed entirely inside the deletion                            | CAGCTCAGATCCTGTTTGTAAAGT | TCCTATTTAGAAGTGCCTTTTT   |

Supplementary table 5: Summary of mapping

| Sample ID | Number of mapped reads | Number of unmapped reads | Number of split reads | Mapping rate | Total length of aligned bases (Gb) | Proportion of aligned bases |
|-----------|------------------------|--------------------------|-----------------------|--------------|------------------------------------|-----------------------------|
| OPH125    | 6364455                | 507436                   | 687222                | 0.926        | 50                                 | 0.931                       |
| OPH176    | 5978972                | 442018                   | 719595                | 0.931        | 58.1                               | 0.93                        |
| OPH217    | 5342357                | 319499                   | 603280                | 0.944        | 43.1                               | 0.932                       |
| OPH332    | 6410503                | 437768                   | 692553                | 0.936        | 47.5                               | 0.925                       |
| OPH447    | 6205007                | 509357                   | 759909                | 0.924        | 44.8                               | 0.929                       |
| OPH517    | 5322419                | 409784                   | 656072                | 0.929        | 47.7                               | 0.927                       |
| OPH531    | 5241981                | 314986                   | 599672                | 0.943        | 48.6                               | 0.935                       |
| OPH556    | 5903551                | 340979                   | 688175                | 0.945        | 50.2                               | 0.93                        |
| OPH566    | 8581230                | 482278                   | 1030869               | 0.947        | 57.6                               | 0.929                       |
| OPH595    | 5002027                | 263187                   | 650390                | 0.950        | 51.2                               | 0.935                       |
| OPH641    | 7549073                | 435051                   | 933530                | 0.946        | 54                                 | 0.926                       |
| OPH690    | 5578458                | 349212                   | 666428                | 0.941        | 52.2                               | 0.929                       |
| OPH693    | 7211072                | 490285                   | 859454                | 0.936        | 55.6                               | 0.927                       |
| OPH831    | 5490637                | 447030                   | 635377                | 0.925        | 48.6                               | 0.928                       |
| OPH861    | 6925489                | 494219                   | 817663                | 0.933        | 54.8                               | 0.929                       |
| Mean      | 6207202                | 416206                   | 733346                | 0.937        | 50.9                               | 0.929                       |

Supplementary table 6: Mean depth and coverage rate in EYS region

| sample                                              | mean depth (LRS) | coverage with sequence depth $\geq 1$ (LRS) | coverage with sequence depth $\geq 5$ (LRS) | coverage with sequence depth $\geq 10$ (LRS) | coverage with sequence depth $\geq 15$ (LRS) | coverage with sequence depth $\geq 20$ (previous study) |
|-----------------------------------------------------|------------------|---------------------------------------------|---------------------------------------------|----------------------------------------------|----------------------------------------------|---------------------------------------------------------|
| OPH125                                              | 16.475           | 0.999                                       | 0.996                                       | 0.963                                        | 0.664                                        | 1                                                       |
| OPH176                                              | 19.293           | 0.999                                       | 0.999                                       | 0.988                                        | 0.869                                        | 1                                                       |
| OPH217                                              | 14.000           | 0.999                                       | 0.996                                       | 0.875                                        | 0.435                                        | 1                                                       |
| OPH332                                              | 14.984           | 0.996                                       | 0.995                                       | 0.920                                        | 0.522                                        | 1                                                       |
| OPH447                                              | 15.028           | 0.999                                       | 0.998                                       | 0.928                                        | 0.550                                        | 1                                                       |
| OPH517                                              | 15.455           | 0.999                                       | 0.998                                       | 0.951                                        | 0.586                                        | 1                                                       |
| OPH531                                              | 16.413           | 1.000                                       | 1.000                                       | 0.967                                        | 0.682                                        | 1                                                       |
| OPH556                                              | 16.241           | 0.998                                       | 0.998                                       | 0.963                                        | 0.652                                        | 1                                                       |
| OPH566                                              | 18.544           | 0.999                                       | 0.999                                       | 0.985                                        | 0.825                                        | 0.998                                                   |
| OPH595                                              | 17.028           | 1.000                                       | 0.999                                       | 0.972                                        | 0.706                                        | 1                                                       |
| OPH641                                              | 16.404           | 0.996                                       | 0.979                                       | 0.837                                        | 0.665                                        | 1                                                       |
| OPH690                                              | 16.714           | 0.999                                       | 0.998                                       | 0.964                                        | 0.666                                        | 1                                                       |
| OPH693                                              | 18.214           | 0.994                                       | 0.993                                       | 0.976                                        | 0.784                                        | 1                                                       |
| OPH831                                              | 15.879           | 1.000                                       | 0.999                                       | 0.938                                        | 0.615                                        | 1                                                       |
| OPH861                                              | 16.262           | 0.998                                       | 0.997                                       | 0.893                                        | 0.638                                        | 0.998                                                   |
| Mean                                                | 16.462           | 0.998                                       | 0.996                                       | 0.941                                        | 0.657                                        | 1.000                                                   |
| LRS: long-read sequencing                           |                  |                                             |                                             |                                              |                                              |                                                         |
| The previous study performed short-read sequencing. |                  |                                             |                                             |                                              |                                              |                                                         |

**Supplementary table 7: Pathogenic variants detected in previous study**

| sample | Causative gene | Chromosome | Position (bp) | Nucleotide change | Amino acid change |
|--------|----------------|------------|---------------|-------------------|-------------------|
| OPH125 | <i>EYS</i>     | 6          | 64,590,909    | c.4957dupA        | p.(Ser1653fs)     |
| OPH176 | <i>EYS</i>     | 6          | 63,721,795    | c.8236G>C         | p.(Asp2746His)    |
| OPH217 | <i>EYS</i>     | 6          | 63,721,226    | c.8805C>A         | p.(Tyr2935*)      |
| OPH332 | <i>EYS</i>     | 6          | 63,721,226    | c.8805C>A         | p.(Tyr2935*)      |
| OPH447 | <i>EYS</i>     | 6          | 63,720,822    | c.9209T>C         | p.(Ile3070Thr)    |
| OPH517 | <i>EYS</i>     | 6          | 64,081,870    | c.6557G>A         | p.(Gly2186Glu)    |
| OPH531 | <i>EYS</i>     | 6          | 63,789,144    | c.7492G>C         | p.(Ala2498Pro)    |
| OPH556 | <i>EYS</i>     | 6          | 64,590,909    | c.4957dupA        | p.(Ser1653fs)     |
| OPH566 | <i>EYS</i>     | 6          | 63,721,226    | c.8805C>A         | p.(Tyr2935*)      |
| OPH595 | <i>EYS</i>     | 6          | 64,590,909    | c.4957dupA        | p.(Ser1653fs)     |
| OPH641 | <i>EYS</i>     | 6          | 64,081,870    | c.6557G>A         | p.(Gly2186Glu)    |
| OPH690 | <i>EYS</i>     | 6          | 64,590,909    | c.4957dupA        | p.(Ser1653fs)     |
| OPH693 | <i>EYS</i>     | 6          | 64,593,185    | c.3809T>G         | p.(Val1270Gly)    |
| OPH831 | <i>EYS</i>     | 6          | 65,495,334    | c.77G>A           | p.(Arg26Gln)      |
| OPH861 | <i>EYS</i>     | 6          | 64,617,507    | c.3595G>T         | p.(Glu1199*)      |

**Supplementary table 8: Number of exon-overlapping SVs by class**

| sample | deletion | insertion | inversion | duplication | translocation |
|--------|----------|-----------|-----------|-------------|---------------|
| OPH125 | 108      | 44        | 10        | 10          | 11            |
| OPH176 | 116      | 45        | 8         | 10          | 7             |
| OPH217 | 84       | 54        | 6         | 10          | 11            |
| OPH332 | 97       | 37        | 7         | 8           | 9             |
| OPH447 | 84       | 40        | 6         | 8           | 8             |
| OPH517 | 105      | 39        | 7         | 7           | 9             |
| OPH531 | 100      | 38        | 6         | 10          | 10            |
| OPH556 | 95       | 45        | 2         | 10          | 15            |
| OPH566 | 111      | 39        | 6         | 13          | 13            |
| OPH595 | 104      | 51        | 8         | 10          | 12            |
| OPH641 | 117      | 49        | 6         | 10          | 9             |
| OPH690 | 101      | 44        | 8         | 11          | 20            |
| OPH693 | 94       | 42        | 6         | 10          | 11            |
| OPH831 | 106      | 42        | 5         | 7           | 12            |
| OPH861 | 116      | 53        | 8         | 12          | 16            |
| Mean   | 102.5    | 44.1      | 6.6       | 9.7         | 11.53         |



Supplementary table 9: *RP1L1* variants in OPH-690 detected using the targeted approach in our previous study.

| Chr. | Position (bp)* | rsID        | REF | ALT | Reference sequence | Nucleotide change | Amino acid change | Type of variant    | Zygosity | MAF (gnomAD)     | ClinVar                                      | HOMG          | SFT                         | PolyPhen          | CADD  | ACMG guideline |
|------|----------------|-------------|-----|-----|--------------------|-------------------|-------------------|--------------------|----------|------------------|----------------------------------------------|---------------|-----------------------------|-------------------|-------|----------------|
| 8    | 10607245       | rs56642448  | C   | T   | NM_178857          | c.G6853A          | p.G2285R          | missense variant   | Het      | 64055/<br>151948 | Benign                                       | Notregistered | deleterious                 | benign            | 16.43 | Benign         |
| 8    | 10607375       | rs56382513  | T   | C   | NM_178857          | c.6723A>G         | p.S2241*          | synonymous variant | Homo     | 85188/<br>151910 | Benign                                       | Notregistered | -                           | -                 | 0.058 | Benign         |
| 8    | 10608238       | rs11783478  | T   | C   | NM_178857          | c.5600A>G         | p.T1954A          | missense variant   | Homo     | 80928/<br>143350 | Benign                                       | Notregistered | tolerated<br>low confidence | benign            | 0.102 | Benign         |
| 8    | 10608432       | rs26446662  | T   | A   | NM_178857          | c.5666A>T         | p.D1889V          | missense variant   | Homo     | 33948/<br>148070 | Benign                                       | Notregistered | tolerated                   | benign            | 0.34  | Benign         |
| 8    | 10608480       | rs200622036 | T   | C   | NM_178857          | c.5618A>G         | p.D1873G          | missense variant   | Het      | 1/<br>144422     | Benign                                       | Notregistered | tolerated                   | benign            | 0.024 | Likely Benign  |
| 8    | 10609614       | rs4841399   | G   | C   | NM_178857          | c.4484C>G         | p.P1496R          | missense variant   | Het      | 42430/<br>152026 | Benign                                       | Notregistered | tolerated                   | benign            | 0.258 | Benign         |
| 8    | 10610117       | rs112656102 | T   | C   | NM_178857          | c.3981A>G         | p.T1327*          | synonymous variant | Het      | 11509/<br>140004 | Benign                                       | Notregistered | -                           | -                 | 1.59  | Benign         |
| 8    | 10610119       | rs146656804 | T   | TTC | NM_178857          | c.3978_3979insGAA | p.T1327_E1328insE | inframe insertion  | Het      | 14837/<br>74880  | Benign                                       | Notregistered | -                           | -                 | 1.73  | Benign         |
| 8    | 10610127       | rs4240699   | T   | C   | NM_178857          | c.3971A>G         | p.E1324G          | missense variant   | Het      | 19483/<br>119966 | Conflicting interpretations of pathogenicity | Notregistered | tolerated                   | benign            | 1.52  | Benign         |
| 8    | 10610142       | rs4840501   | G   | C   | NM_178857          | c.3956C>G         | p.A1319G          | missense variant   | Het      | 35483/<br>87176  | Benign                                       | Notregistered | tolerated                   | benign            | 0.046 | Benign         |
| 8    | 10616532       | rs4388421   | T   | G   | NM_178857          | c.665A>C          | p.H222P           | missense variant   | Homo     | 27432/<br>152082 | Benign                                       | Notregistered | deleterious                 | possibly damaging | 22.6  | Benign         |

\* Chromosomes are based on Human GRCh38. REF, reference allele; ALT, alternative allele; gnomAD, Genome Aggregation Database; MAF, Minor allele frequency.

Supplementary note: The adaptation of the ACMG guidelines for heterozygous pathogenic SNVs identified in our previous study

In OPH641, according to the ACMG guidelines, the PM2, PP1, PP3, PP4, and PP5 criteria were applied to p.(Gly2186Glu) (**online supplemental table S7**) identified in previous study because it was reported to be infrequent in 1000 Genomes control data, segregated with the phenotype,<sup>1</sup> the pathogenicity is supported by computational evidence such as polyphen and SIFT, the phenotype of the patient is consistent with RP, which is Mendelian disease, and that it is considered pathogenic by ClinVar. Therefore, the SNV was considered likely pathogenic. In OPH861, according to the ACMG guidelines, the PVS1, PM2 and PM6 criteria were applied to p.(Glu1199\*) (**online supplemental table S7**) identified in the previous study because it is a nonsense variant, have a low frequency in the 1000 Genomes control data, has not been registered in the SNV database, and is considered a de novo variant. Therefore, the SNV was considered pathogenic.

| Sample | Gene | Variant        | Pathogenicity     | Evidence criteria | Reference                                                                                                                                                                  |
|--------|------|----------------|-------------------|-------------------|----------------------------------------------------------------------------------------------------------------------------------------------------------------------------|
| OPH641 | EYS  | p.(Gly2186Glu) | Likely Pathogenic | PM2               | 1000 Genomes ( <a href="https://www.internationalgenome.org/">https://www.internationalgenome.org/</a> )                                                                   |
|        |      |                |                   | PP1               | Iwanami M. et al. <i>Mol Vis</i> . 2019                                                                                                                                    |
|        |      |                |                   | PP3               | PolyPhen-2 ( <a href="http://genetics.bwh.harvard.edu/pph2/">http://genetics.bwh.harvard.edu/pph2/</a> ), SIFT ( <a href="http://sift.jcvi.org">http://sift.jcvi.org</a> ) |
|        |      |                |                   | PP4               | online supplemental figure 5                                                                                                                                               |
|        |      |                |                   | PP5               | ClinVar ( <a href="http://www.ncbi.nlm.nih.gov/clinvar">http://www.ncbi.nlm.nih.gov/clinvar</a> )                                                                          |
| OPH861 | EYS  | p.(Glu1199*)   | Pathogenic        | PVS1              | ANNOVAR (V.3.4) ( <a href="https://annovar.openbioinformatics.org/en/latest/">https://annovar.openbioinformatics.org/en/latest/</a> )                                      |
|        |      |                |                   | PM2               | 1000 Genomes ( <a href="https://www.internationalgenome.org/">https://www.internationalgenome.org/</a> )                                                                   |
|        |      |                |                   | PM6               | dbSNP ( <a href="http://www.ncbi.nlm.nih.gov/snp">http://www.ncbi.nlm.nih.gov/snp</a> )                                                                                    |

## REFERENCE

- Iwanami M, Oishi A, Ogino K, Seko Y, Nishida-Shimizu T, Yoshimura N, Kato S. Five major sequence variants and copy number variants in the EYS gene account for one-third of Japanese patients with autosomal recessive and simplex retinitis pigmentosa. *Mol Vis* 2019;**25**:766–79.
